# Supplementary material for: Neuromedin B mediates IL-6 and COX-2 expression through NF-κB/P65 and AP-1/C-JUN activation in human primary myometrial cells
Source: PubMed Central journal article supplement (PMC6822491; doi:10.1042/bsr20192139), 2019-10-11
Supplement: BSR-2019-2139_supp.pdf [file BSR-2019-2139_supp.pdf]

## SUPPLEMENTAL FIGURE LEGENDS

Figure S1

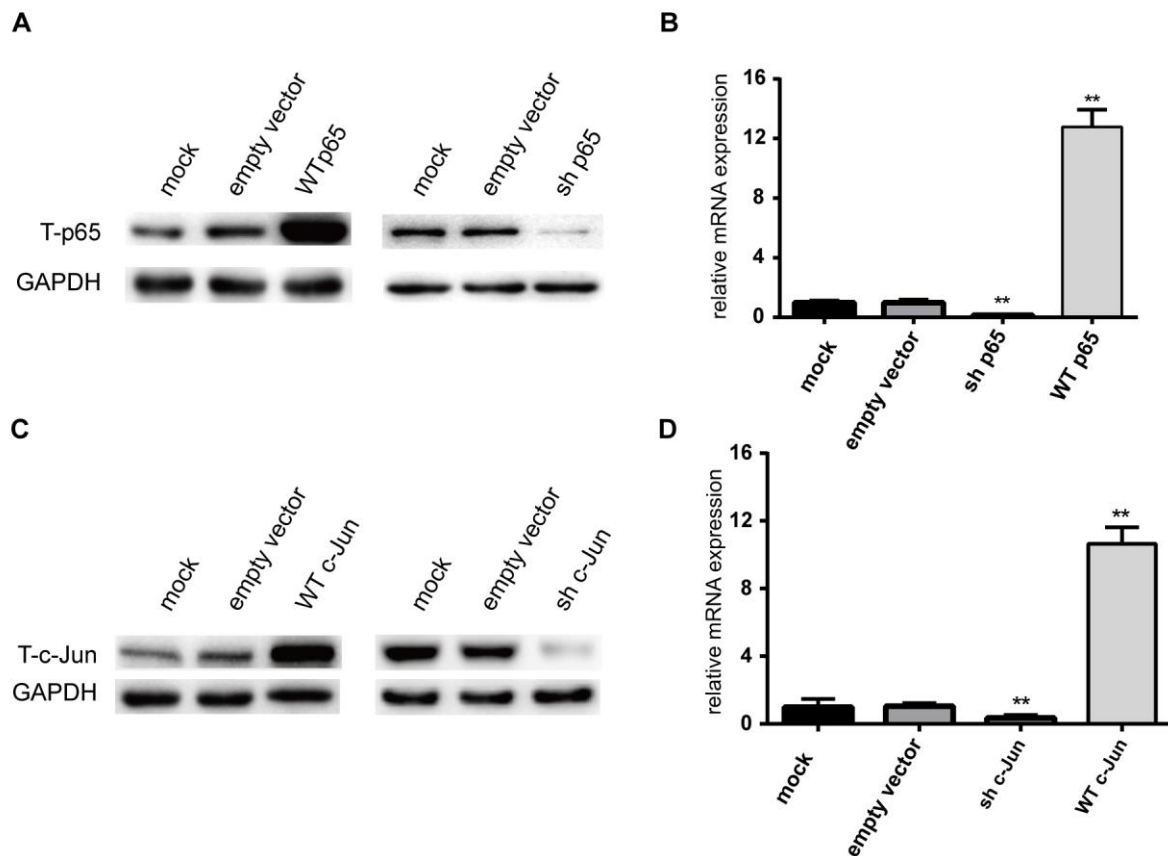

**Figure S1. The efficiency of lentiviruses mediated p65 and c-Jun knockdown or overexpression in primary myometrial cells. A-B)**The protein (A) and mRNA (B) levels of p65 in primary myometrial cells infected with lentiviruses with WTp65 overexpression or knockdown, respectively. **C-D)**The protein (C) and mRNA (D) levels of c-Jun in primary myometrial cells infected with lentiviruses with WTc-Jun overexpression or knockdown, respectively. Representative western blot results are shown. Data are expressed as mean  $\pm$  SD of three independent experiments (n = 3). \* $P < 0.05$ ; \*\* $P < 0.01$ , against the empty vector group.

Figure S2

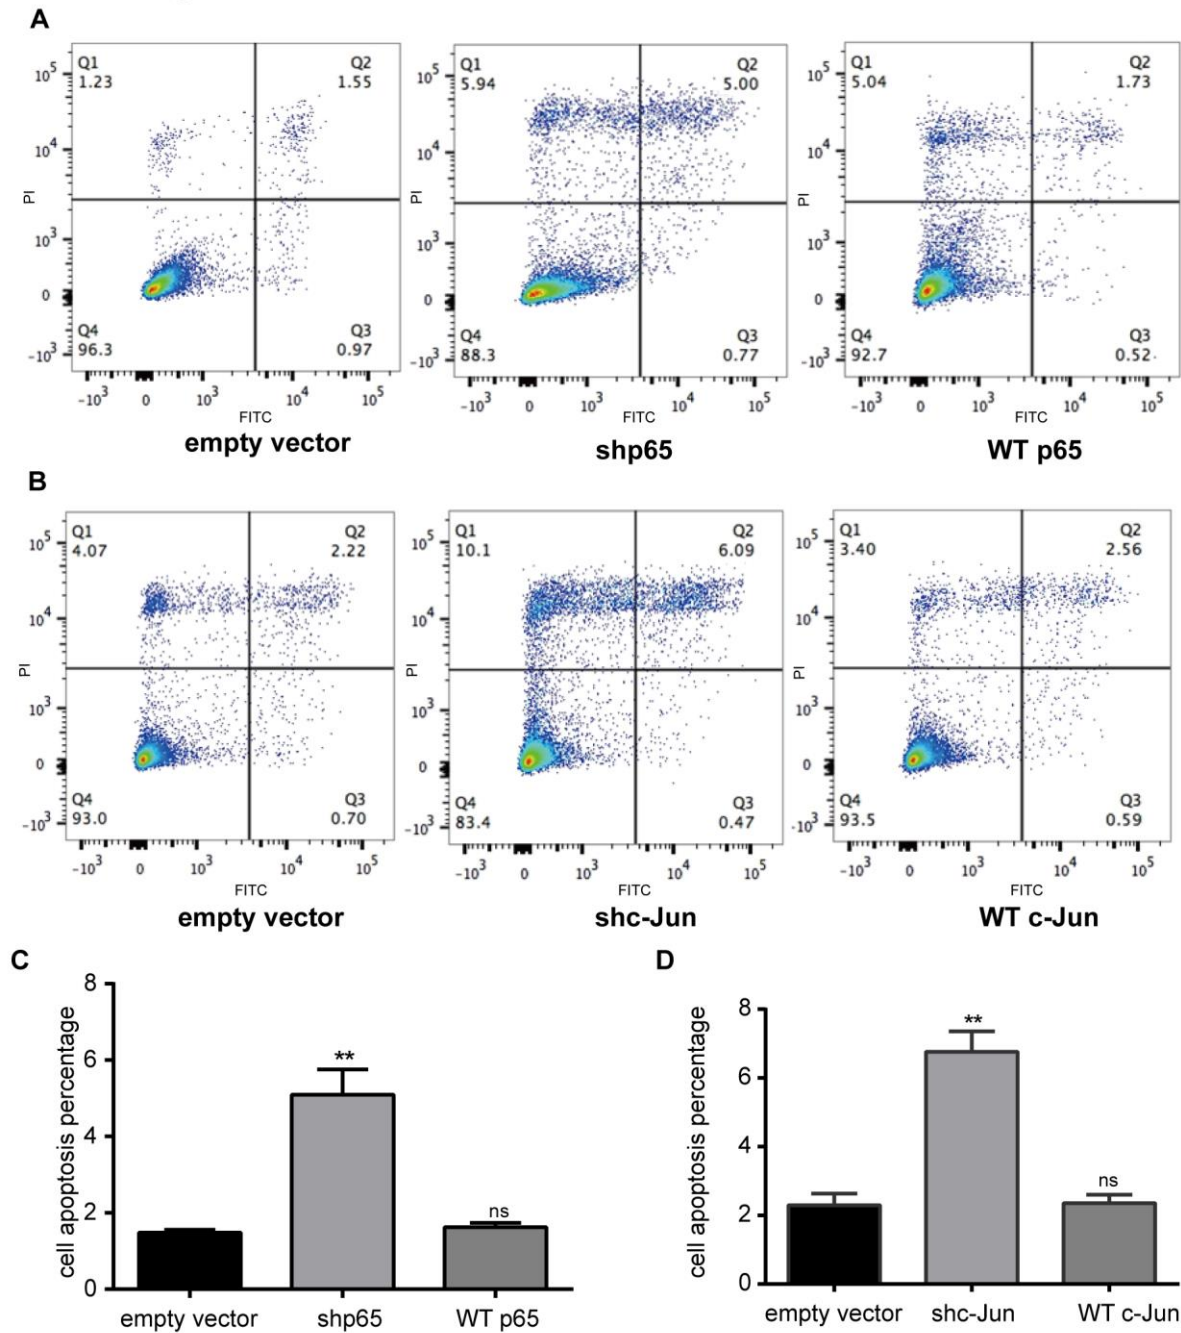

**Figure S2. The Effect of p65 and c-Jun knockdown or overexpression on apoptosis of primary myometrial cells. A-B)** Apoptosis of primary myometrial cells infected with lentiviruses with WTp65 (A) or WTc-Jun (B) overexpression or knockdown was determined by flow cytometry. Data are expressed as mean  $\pm$  SD of three independent experiments (n = 3). \* $P$  < 0.05; \*\* $P$  < 0.01, against the empty vector group.
